# Supplementary material for: 2-Hydroxyglutarate Metabolism Is Altered in an in vivo Model of LPS Induced Endotoxemia
Source: PubMed Central journal article supplement (PMC7063103; doi:10.3389/fphys.2020.00147), 2020-03-03
Supplement: Data_Sheet_1.pdf [file Data_Sheet_1.pdf]

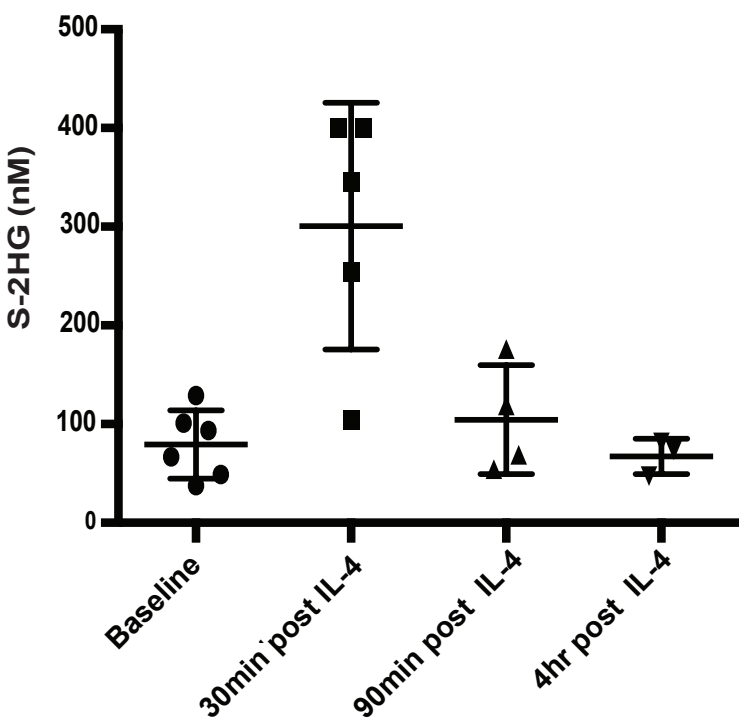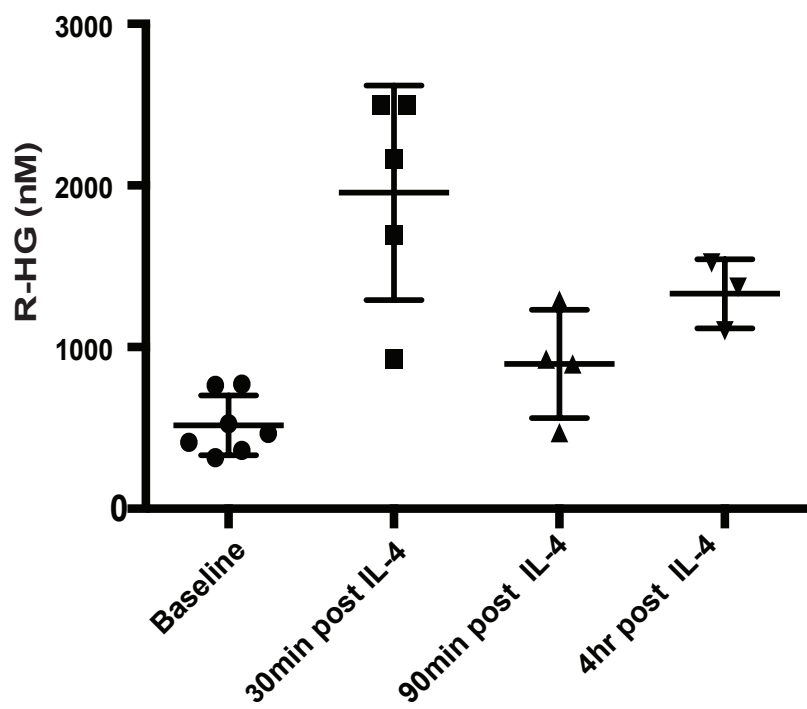

Supplementary Figure 1

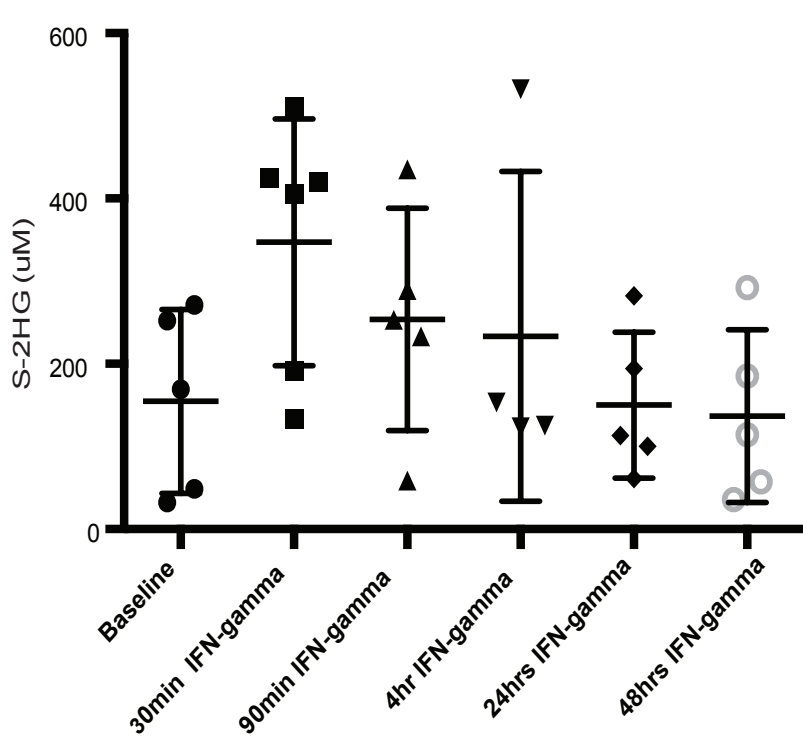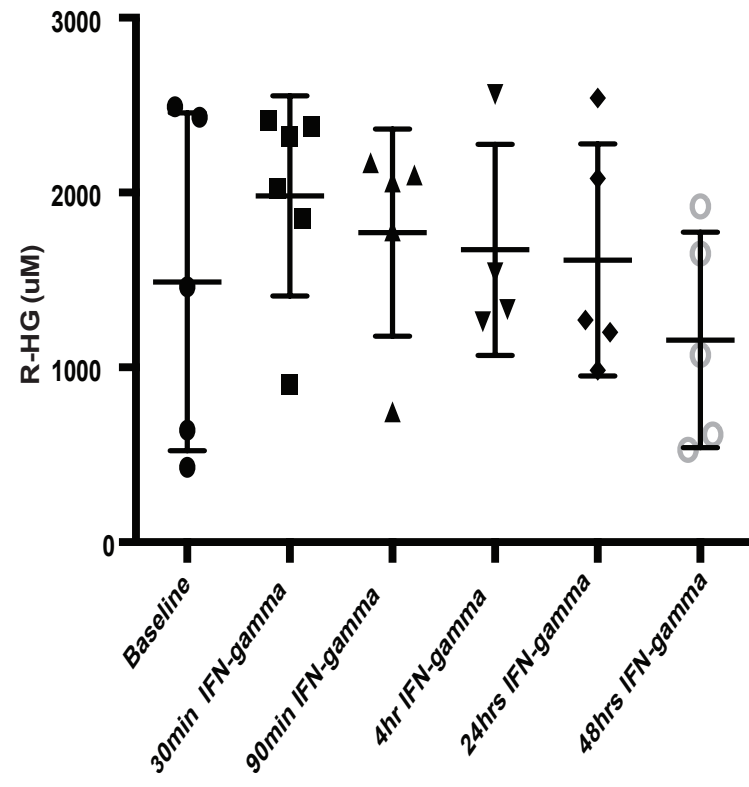

Supplementary Figure 2

# BASELINE

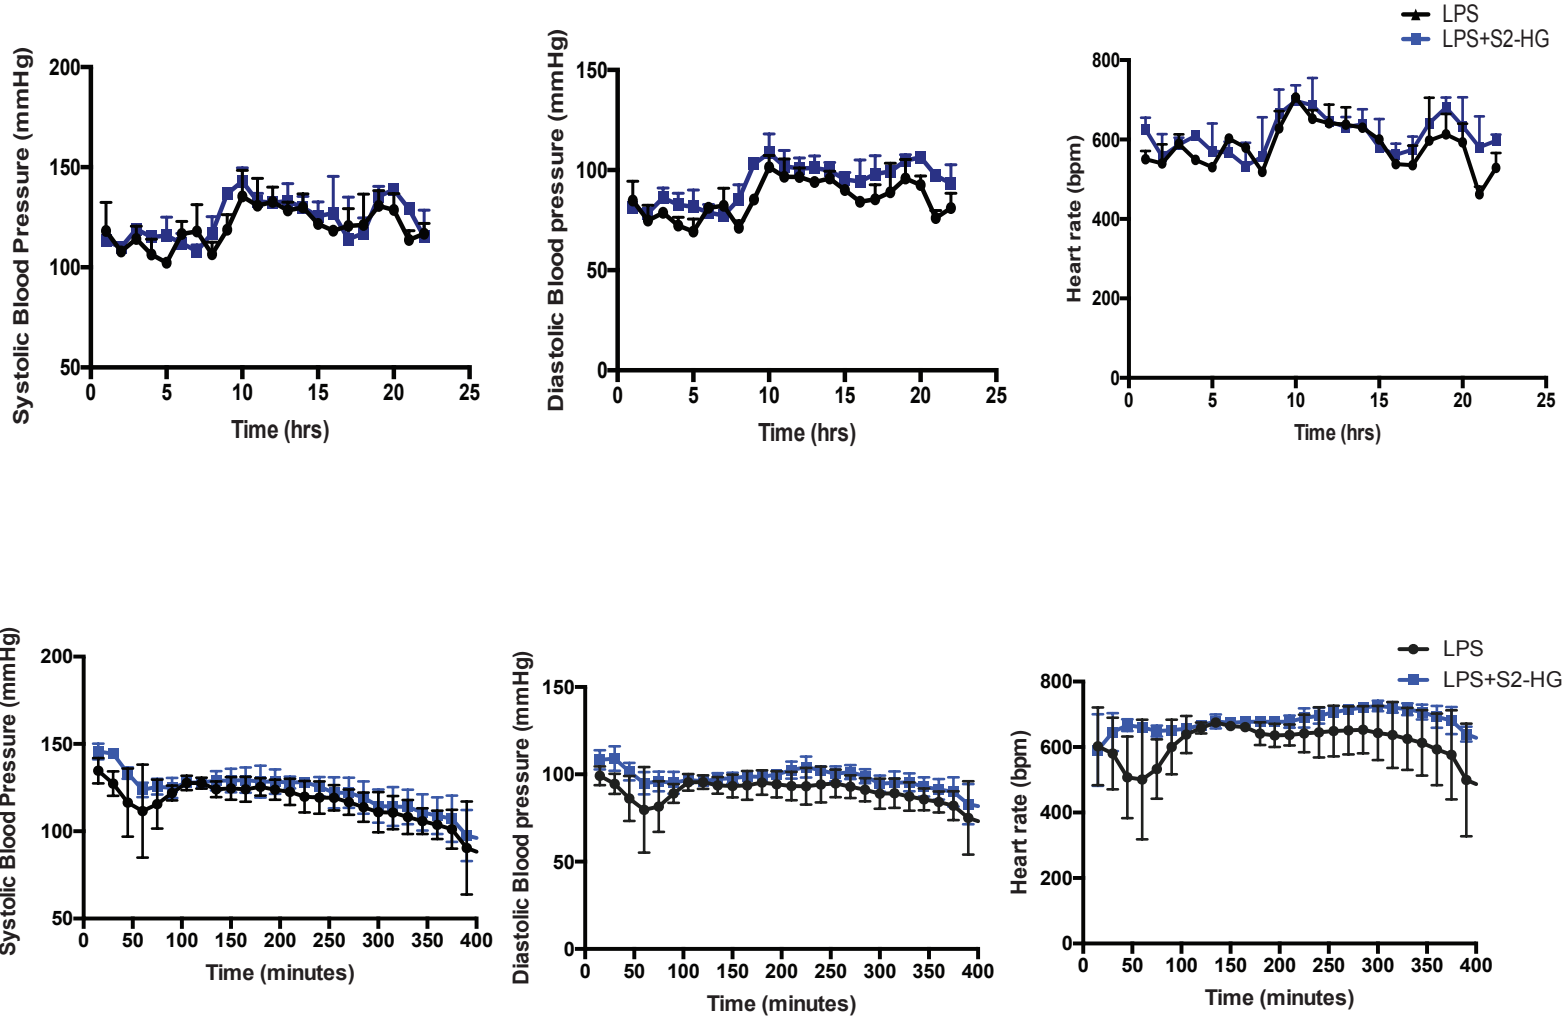

Supplementary Figure 3
